# Supplementary material for: Heterogeneous uptake of ammonia and dimethylamine into sulfuricand oxalic acid particles
Source: Copernicus journal article supplement (doi:10.5194/acp-2016-995), 2016-11-17
Supplement: Supplementary file 1 [file acp-2016-995-supplement.pdf]

# Heterogeneous uptake of ammonia and dimethylamine into sulfuric and oxalic acid particles

Meike Sauerwein<sup>1</sup> and Chak K. Chan<sup>1,2,3</sup>

<sup>1</sup> Division of Environment, Hong Kong University of Science and Technology, Clear Water Bay, Kowloon, Hong Kong

<sup>2</sup> Department of Chemical and Biomolecular Engineering, Hong Kong University of Science and Technology, Clear Water Bay, Kowloon, Hong Kong

<sup>3</sup> School of Energy and Environment, City University of Hong Kong, Kowloon, Hong Kong

*Correspondence to:* Chak K. Chan (Chak.K.Chan@cityu.edu.hk)

## Supplementary Figures

Figure S1: Experimental setup of simultaneous absorption of dimethylamine and ammonia in sulfuric acid and oxalic acid particles. The experimental procedure includes RH conditioning, Gas generation, Flow cell reaction, Particle analysis with the Ion Chromatograph, and Phase state and morphology observation with a Microscope Raman. Abbreviations: HP N<sub>2</sub>, high purity nitrogen gas, RH, relative humidity; DMA, dimethylamine..... 2

Figure S2: Morphological changes during the uptake of 1.0 ppm DMA and 1.9 ppm NH<sub>3</sub> into oxalic acid particles at 70% RH. .... 2

## Methods

### Experimental setup

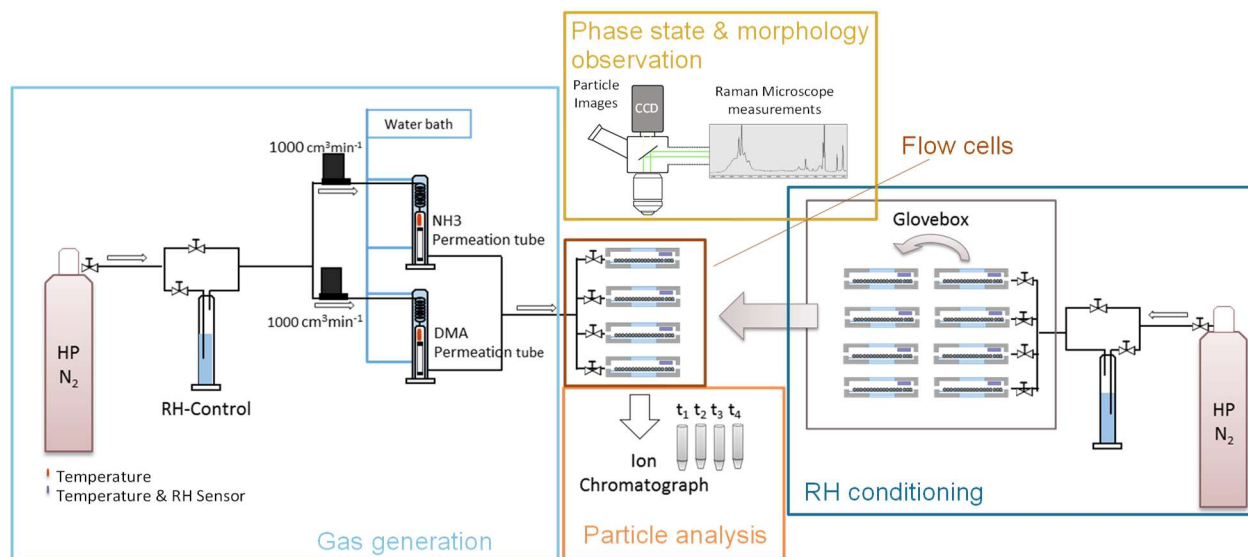

Figure S1: Experimental setup of simultaneous absorption of dimethylamine and ammonia in sulfuric acid and oxalic acid particles. The experimental procedure includes RH conditioning, Gas generation, Flow cell reaction, Particle analysis with the Ion Chromatograph, and Phase state and morphology observation with a Microscope Raman. Abbreviations: HP N<sub>2</sub>, high purity nitrogen gas, RH, relative humidity; DMA, dimethylamine.

## Results and discussion

### Section 3. Uptake into oxalic acid particles

ox0.5<sub>70%</sub>

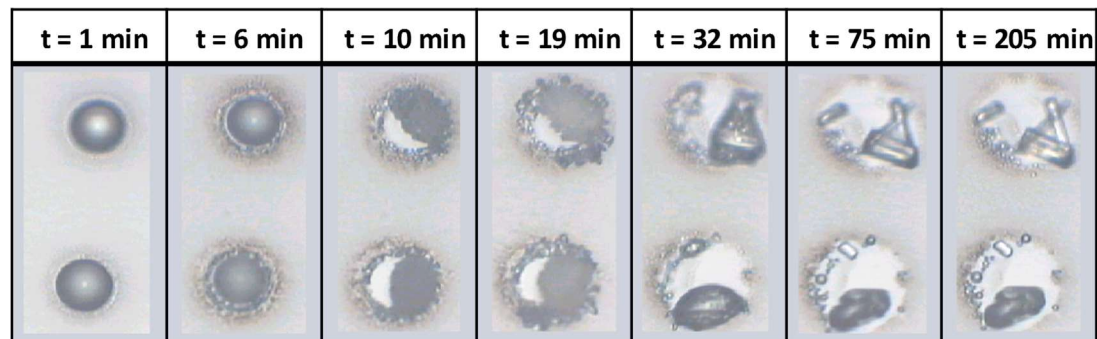

Figure S2: Morphological changes during the uptake of 1.0 ppm DMA and 1.9 ppm NH<sub>3</sub> into oxalic acid particles at 70% RH.
